# Supplementary material for: Preparation of g-C3N4/Graphene Composite for Detecting NO2 at Room Temperature
Source: MDPI journal article supplement (doi:10.3390/nano7010012), 2017-01-12
Supplement: s1 [file s1]

## Supplementary Materials: Preparation of g-C<sub>3</sub>N<sub>4</sub>/Graphene Composite for Detecting NO<sub>2</sub> at Room Temperature

Shaolin Zhang, Nguyen Thuy Hang, Zhijun Zhang, Hongyan Yue and Woochul Yang

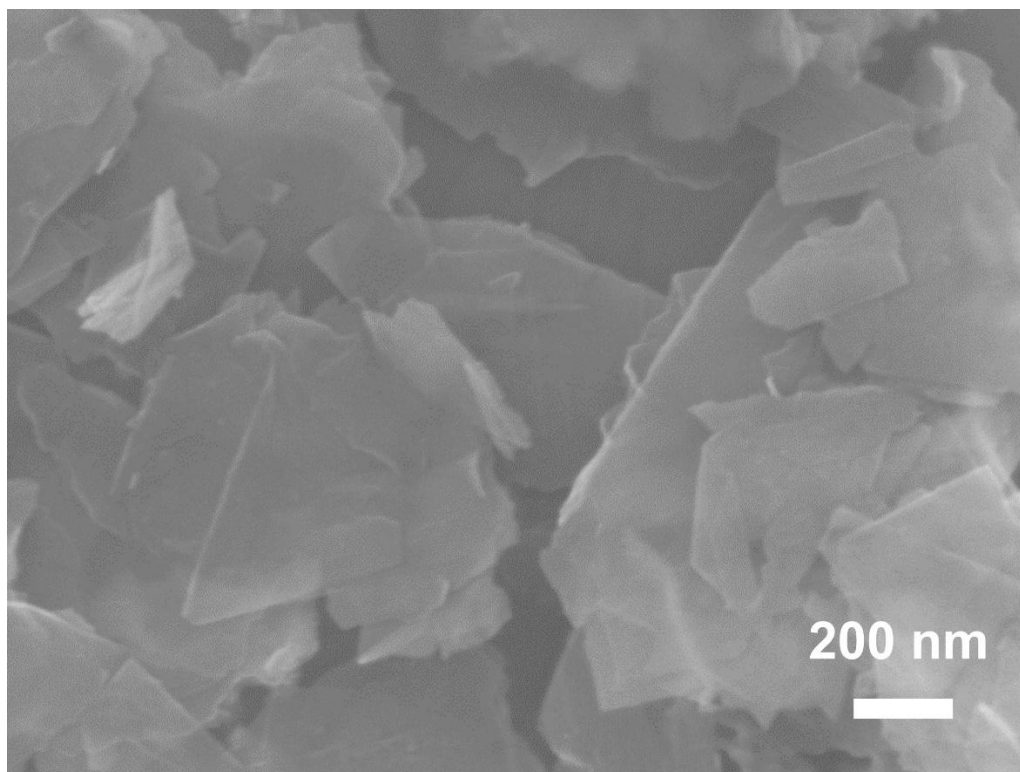

**Figure S1.** SEM of g-C<sub>3</sub>N<sub>4</sub>/graphene nanocomposite.

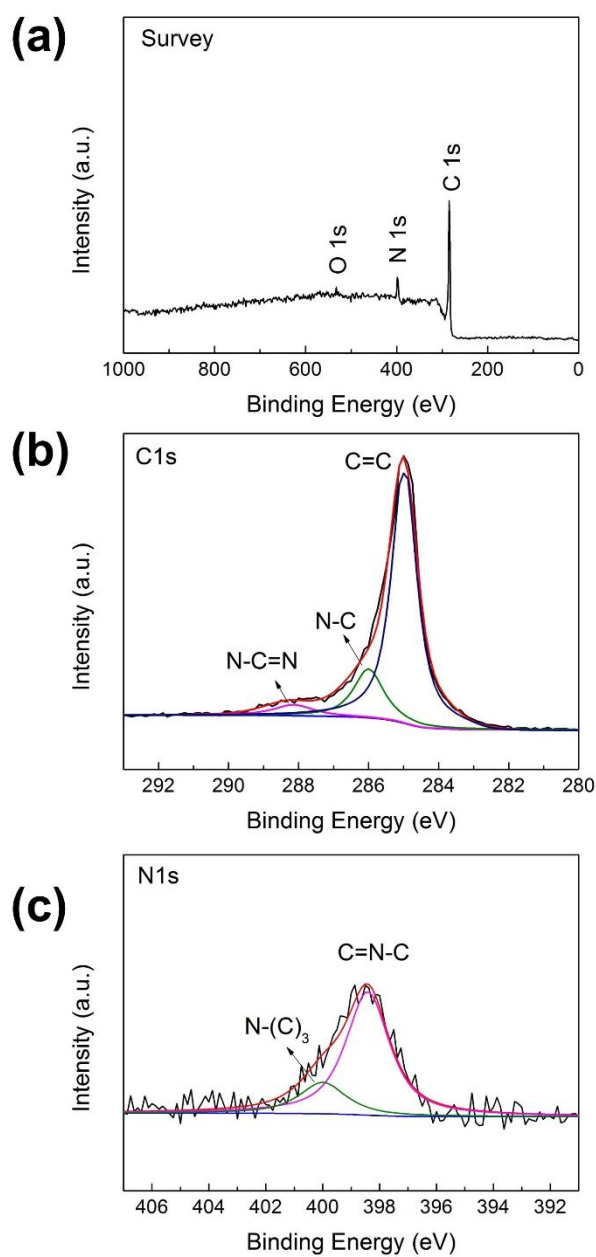

**Figure S2.** XPS spectra of g-C<sub>3</sub>N<sub>4</sub>/graphene nanocomposite: (a) survey scan; (b) C1s; and (c) N1s.
